# Supplementary material for: Structure–Toxicity Relationship in Intermediate Fibrils from α-Synuclein Condensates
Source: PubMed Central journal article supplement — J Am Chem Soc. 2024 Apr 3;146(15):10537–49. doi: 10.1021/jacs.3c14703 (PMC11027145; doi:10.1021/jacs.3c14703), 2024-04-03
Supplement: ja3c14703_si_001.pdf [file ja3c14703_si_001.pdf]

# Structure-toxicity Relationship in Intermediate Fibrils from $\alpha$ -Synuclein Condensates

Serene W. Chen<sup>†</sup>, Joseph D. Barritt<sup>†</sup>, Roberta Cascella, Alessandra Bigi, Cristina Cecchi, Martina Banchelli, Angelo Gallo, James A. Jarvis, Fabrizio Chiti, Christopher M. Dobson, Giuliana Fusco<sup>\*</sup> and Alfonso De Simone<sup>\*</sup>

<sup>†</sup> These authors contributed equally to this work

<sup>\*</sup>Alfonso De Simone and Giuliana Fusco

**Emails:** alfonso.desimone@unina.it and gf203@cam.ac.uk

## **This PDF file includes:**

Figures S1 to S16

Tables S1 to S3

SI References

## SI Figures

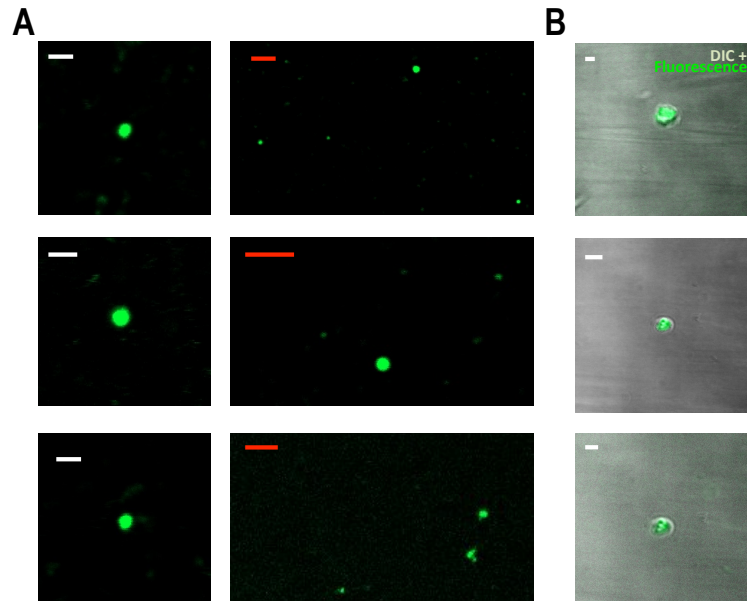

**Figure S1. Gallery of confocal microscopy and DIC images of  $\alpha$ S spherical condensates.** The condensates readily form at 37 °C at the incubation conditions utilized in this study. The condensates present a round shape and liquid-like properties (Fig. S2). The present images were measured using fluorescently labeled  $\alpha$ S samples (using 1% of AF488- $\alpha$ S<sub>N122C</sub>). **A)** Gallery of confocal microscope images of spherical  $\alpha$ S condensates. Scale bars of 1 $\mu$ m (white) and 5 $\mu$ m (red). **B)** Differential Inference Contrast (DIC) microscopy images merged with fluorescence confocal microscopy images of large  $\alpha$ S condensates (scale bar 1 $\mu$ m).

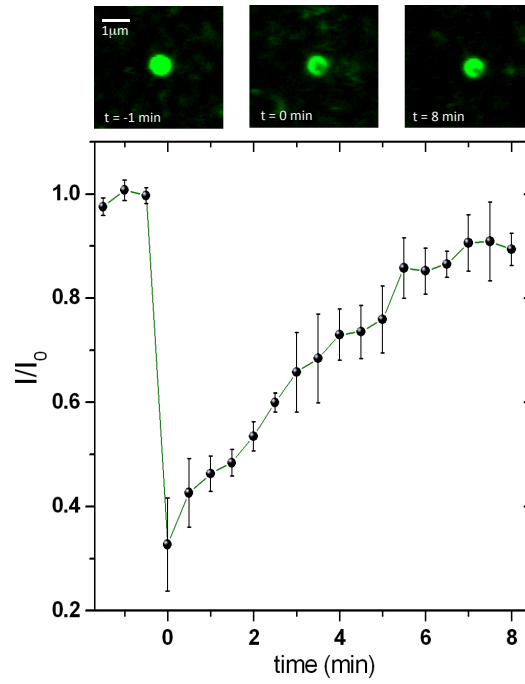

**Figure S2. Fluorescence recovery after photobleaching (FRAP) experiments.** (top) Fluorescently labeled condensate of  $\alpha$ S (1% of AF488- $\alpha$ S<sub>N122C</sub>) prior bleaching (left), immediately after bleaching (centre) or after 8 min after bleaching (right) the bleaching show the liquid like properties of the condensate (scale bar 2 $\mu$ m). (bottom) Analysis of the fluorescence intensity in the ROI ( $I$ ) during the FRAP experiments. Error bars from triplicates.

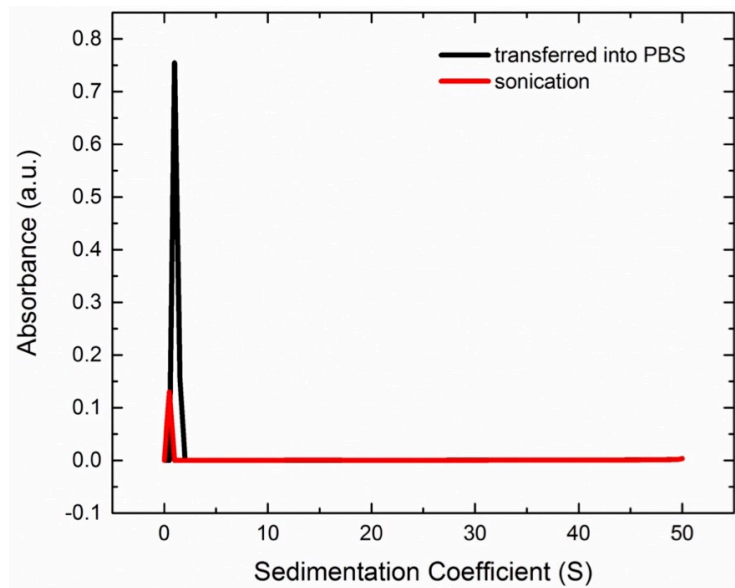

**Figure S3. Liability of the *early-fibrils* from  $\alpha$ S condensates.** Sedimentation coefficients of the *early-fibrils* measured using analytical ultracentrifugation. The measurement indicates that the fibrils disassemble into monomers as a result of sonication (red) or transfer into PBS for 24h (black), with no presence of detectable oligomers.



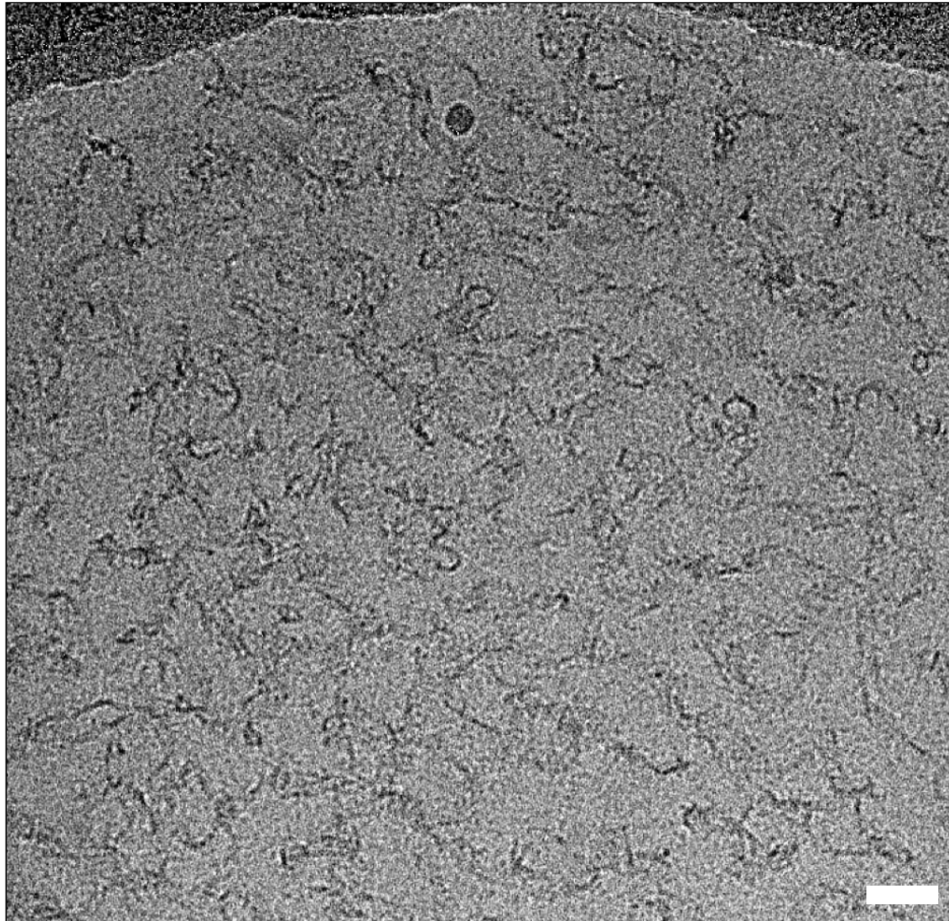

**Figure S4. CryoEM micrograph of *early-fibrils* from  $\alpha$ S condensates.** Representative micrograph of early-fibrils measured using Titan Krios 300 kV microscope with Falcon III detector. Scale bar 200 nm.

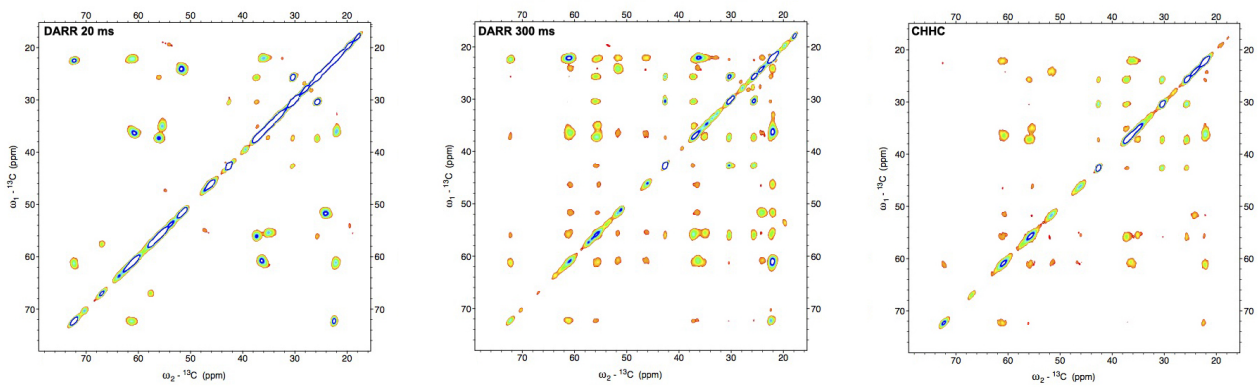

**Figure S5. DARR and CHHC spectra of *early-fibrils* from  $\alpha$ S condensates.** Core regions of the *early-fibrils* probed using CP MAS ssNMR. The acquisition of well resolved CP MAS spectra, as here shown in the examples of DARR<sup>1</sup> (mixing times of 20 and 300 ms) and CHHC spectra,<sup>2</sup> indicates that the *early-fibrils* are relatively homogeneous in the local structure of the core regions. By contrast, the variety of curvatures in the fibrils stretches had likely a negative impact on single particle analysis of the cryo-EM data.

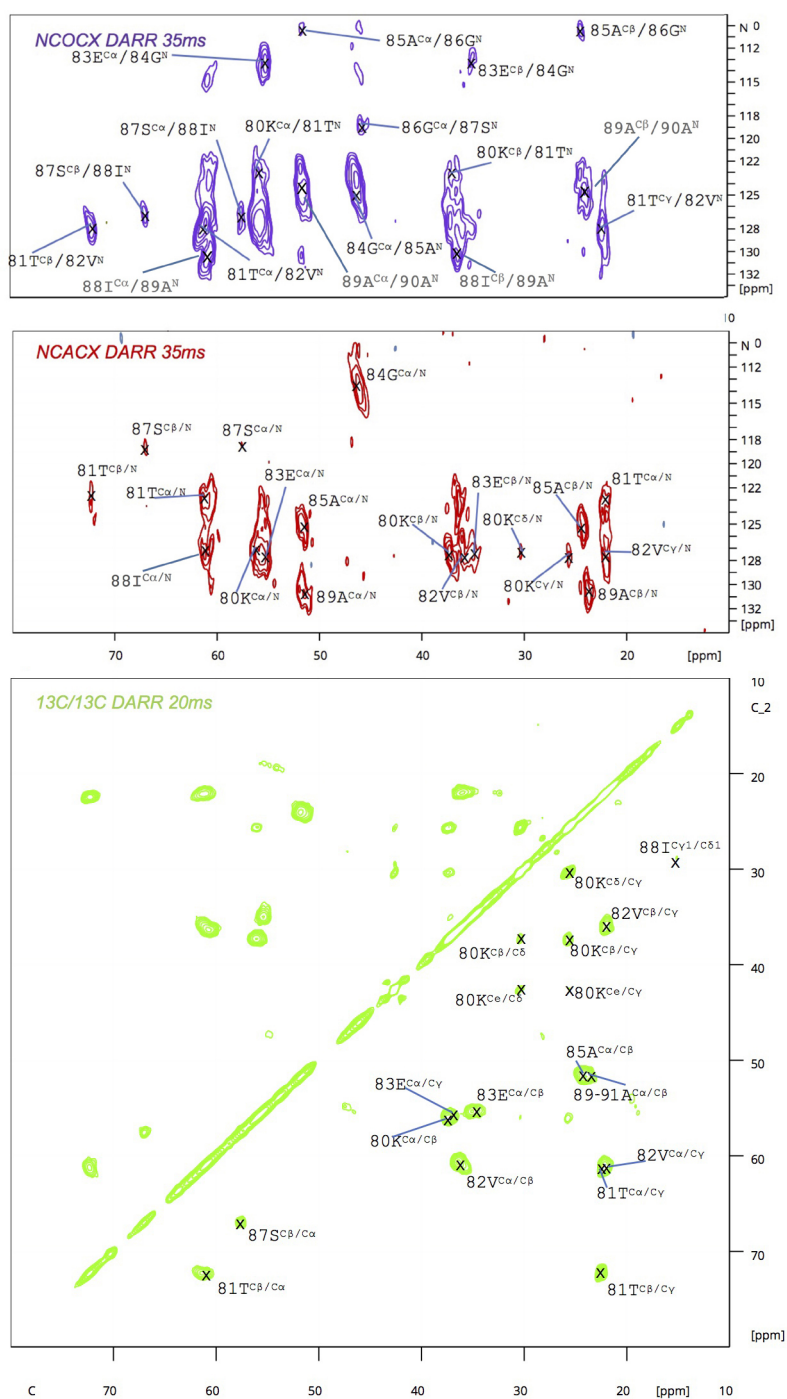

**Figure S6. Assignment of the ssNMR resonances of the *early-fibrils* of  $\alpha$ S.** The resonances of the MAS ssNMR  $^{13}\text{C}$ - $^{13}\text{C}$  DARR spectra of the *early-fibrils* were assigned by means of a combination of NCACX and NCOCX. While the DARR spectra showed relatively sharp  $^{13}\text{C}$  resonances, these intermediate fibrils were found to possess faster transverse relaxation in the  $^{15}\text{N}$  nuclei, resulting in broader resonances on these nuclei. Despite the broad nature of  $^{15}\text{N}$  resonances, the combination of NCACX and NCOCX identified unambiguous pairs of consecutive residues, including TV, EG, AG, GA, SI, AA, and IA. These pairs are all simultaneously present in one single region of the protein, namely the fragment 80-KTVEGAGSIAAA-91. A vertical stack of NCOCX, NCACX and DARR (20 ms mixing time) is shown. These data were verified using 3D versions of (NCOCX and NCACX).

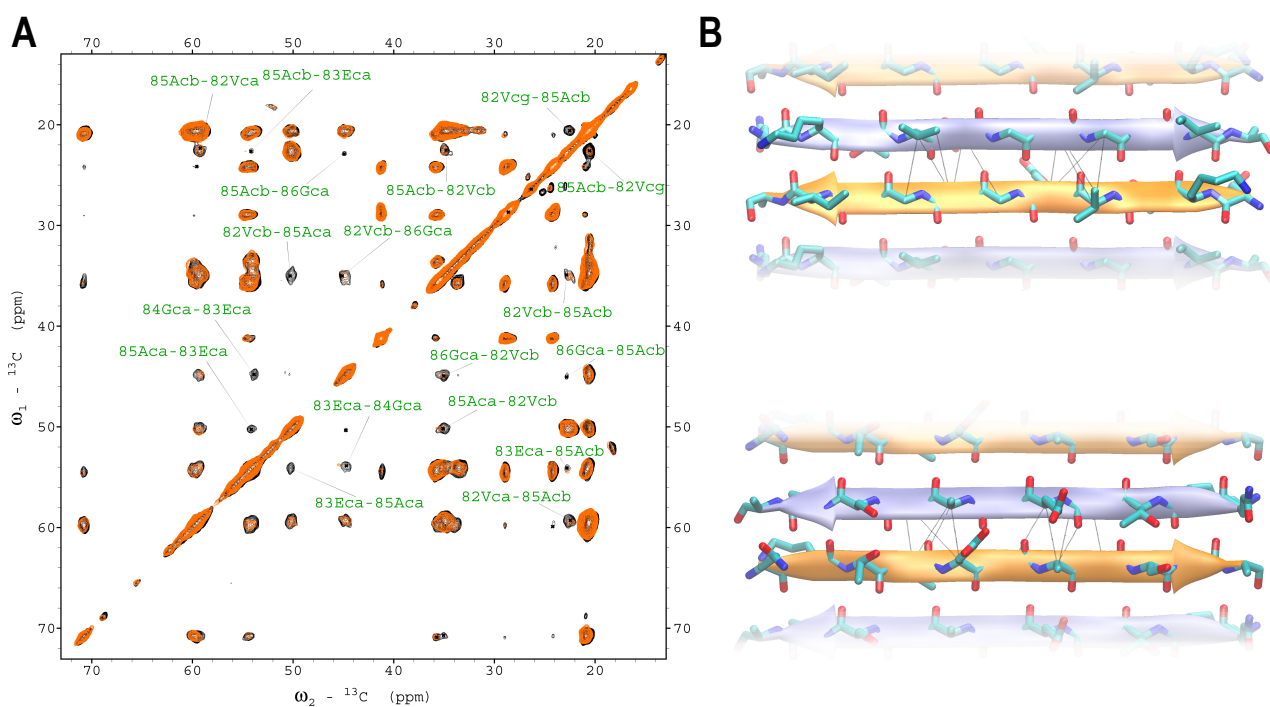

**Figure S7. Intermolecular contacts in *early-fibrils* from  $\alpha\text{S}$  condensates probed using 300 ms  $^{13}\text{C}$ - $^{13}\text{C}$  DARR ssNMR. A)** Overlay of  $^{13}\text{C}$ - $^{13}\text{C}$  DARR ssNMR spectra of *early-fibrils* measured with a mixing time of 300 ms. Black spectrum:  $^{13}\text{C}$  fully-labelled; Orange spectrum: 50:50  $^{13}\text{C}$ : $^{12}\text{C}$  mixed-labelled. Some cross-peaks in the  $^{13}\text{C}$  fully-labelled spectrum cannot be associated to local contacts in the  $\alpha\text{S}$  sequence. The reduced signal-to-noise of these peaks in the mixed-labelled sample, however, indicates that they arise from inter-molecular contacts across  $\beta$ -strands. **B)** Structural model of the  $\beta$ -sheet based on the intermolecular contacts identified in the 300ms DARR in the fragment 80-KTVEGAGSIAAA-91. The ssNMR-informed modelling was consistent with an antiparallel topology revealing an asymmetric distribution of the side chains in the  $\beta$ -sheet, with one surface presenting mainly hydrophobic side chains (top) and the opposite showing mostly hydrophilic side chains (bottom).

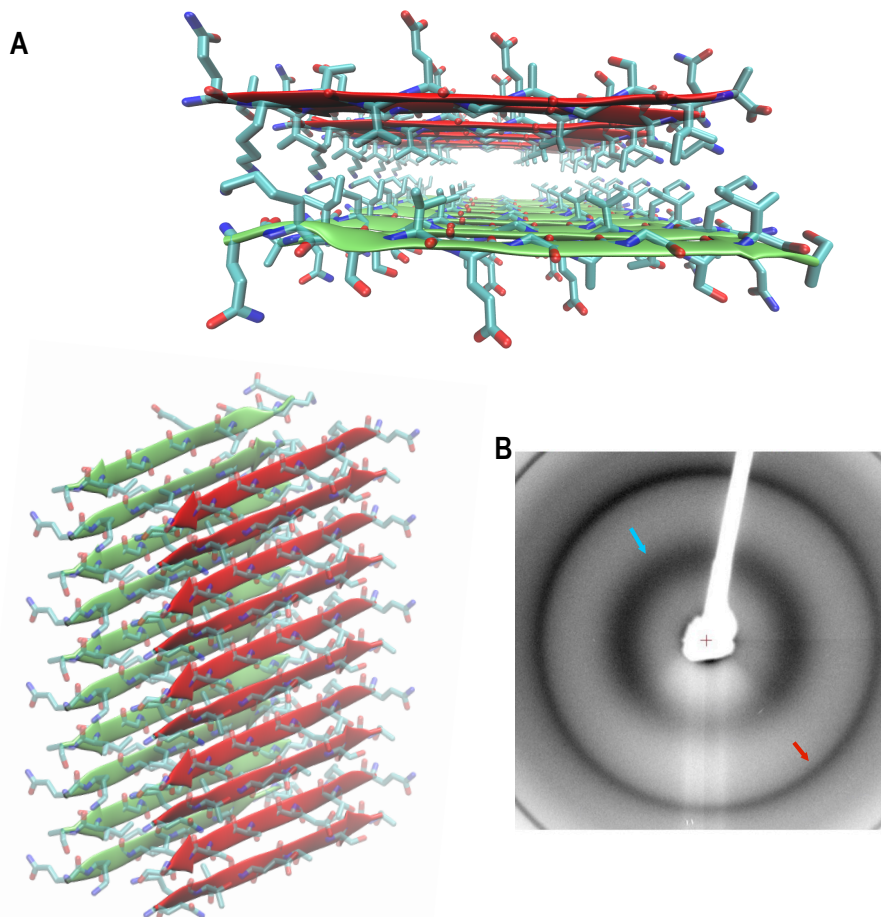

**Figure S8. Model of the fibril core of the *early-fibrils* of  $\alpha$ S from sparse biophysical data.** **A)** Starting from the model of the antiparallel  $\beta$ -sheet unit (Fig. S7), it was possible to generate a model of the stack of two  $\beta$ -sheets using the information of the un-oriented X-ray diffraction pattern (**B**), showing a reflection at 10 Å (cyan arrow). The model suggests that the fragment 80-KTVEGAGSIAAA-91 can generate a  $\beta$ -sheet stacking with a hydrophobic core, stabilized by bulky residues such as Val and Ile, and hydrophilic side chains pointing toward the solvent. The presence of Gly residues in the  $\beta$ -sheet stack may provide these transient aggregates with the structural plasticity to allow for the variety of curvatures observed in cryo-EM analyses (Fig. S4 and 3A).

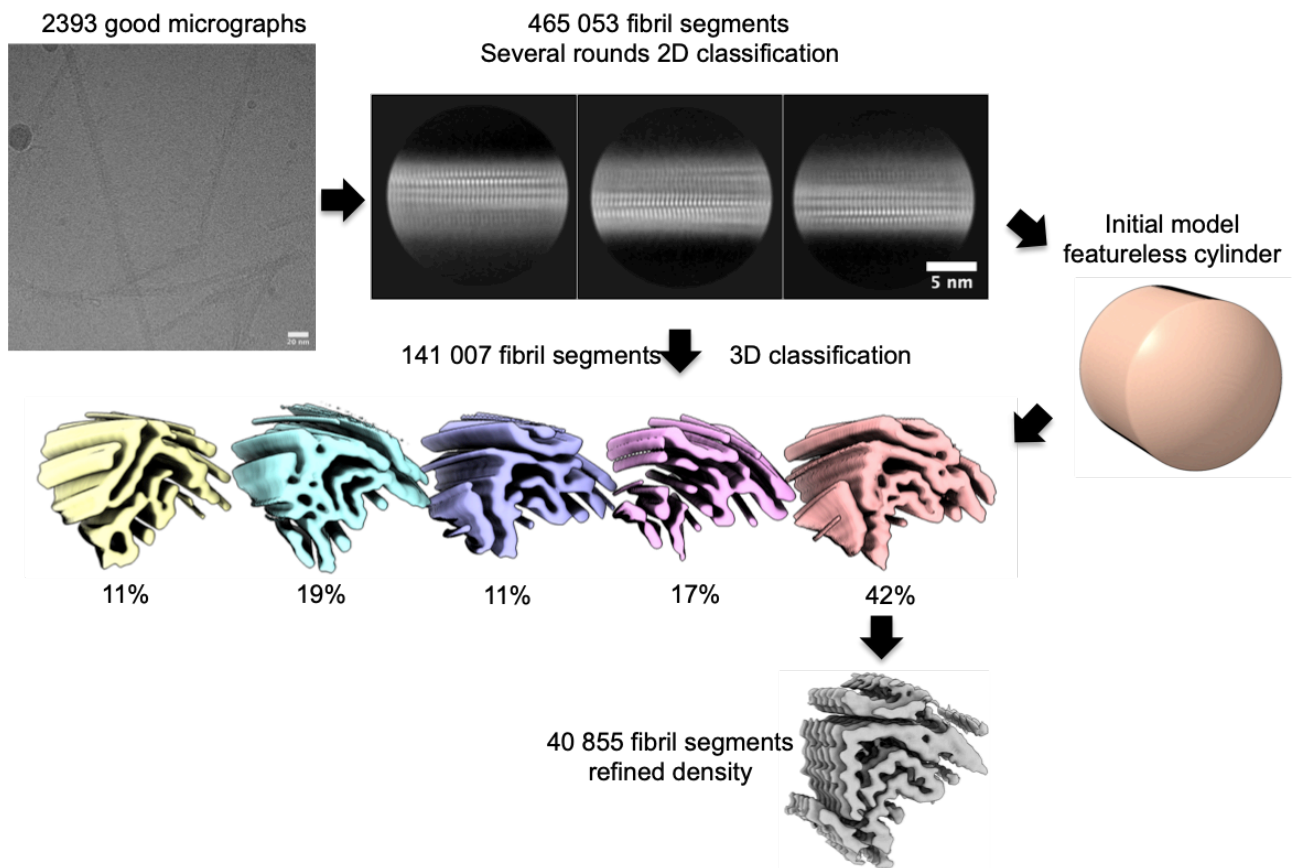

**Figure S9. Helical reconstruction of the *late-fibrils* structure from cryo-EM images.** Raw cryo-EM micrographs of the *late-fibrils* measured with a Titan Krios 300 kV microscope were processed into 2D class averages. Several rounds of 2D classification were used to select the best particles for 3D reconstruction. Successive rounds of 3D classification further removed noisy or ambiguous fibril segments. The final refined helical reconstruction was filtered with a B-factor of -200 using post-processing.



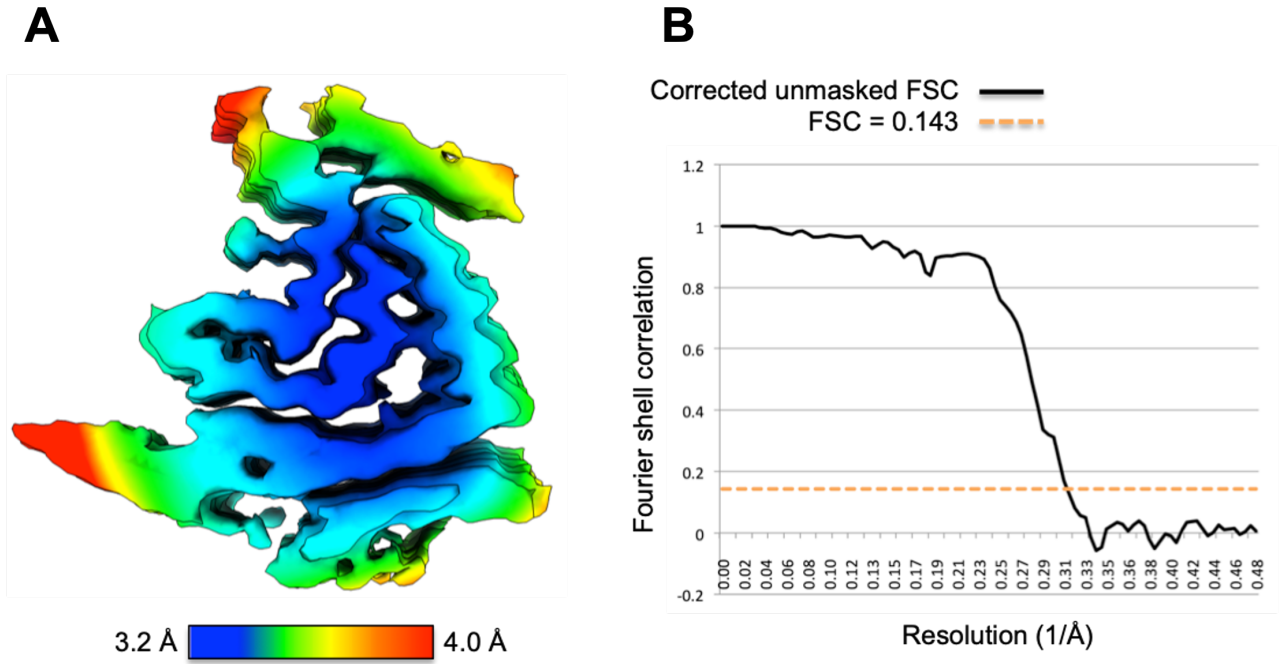

**Figure S10. Resolution estimates of the final EM density map of the *late-fibrils*.** The local resolution of the final sharpened map ranges from 3.2 (blue) to 4.0 Å (red) highlighted by a heat map in A. The Fourier shell correlation curve for the same masked density from A with a global resolution of 3.3Å at a cutoff of FSC = 0.143.

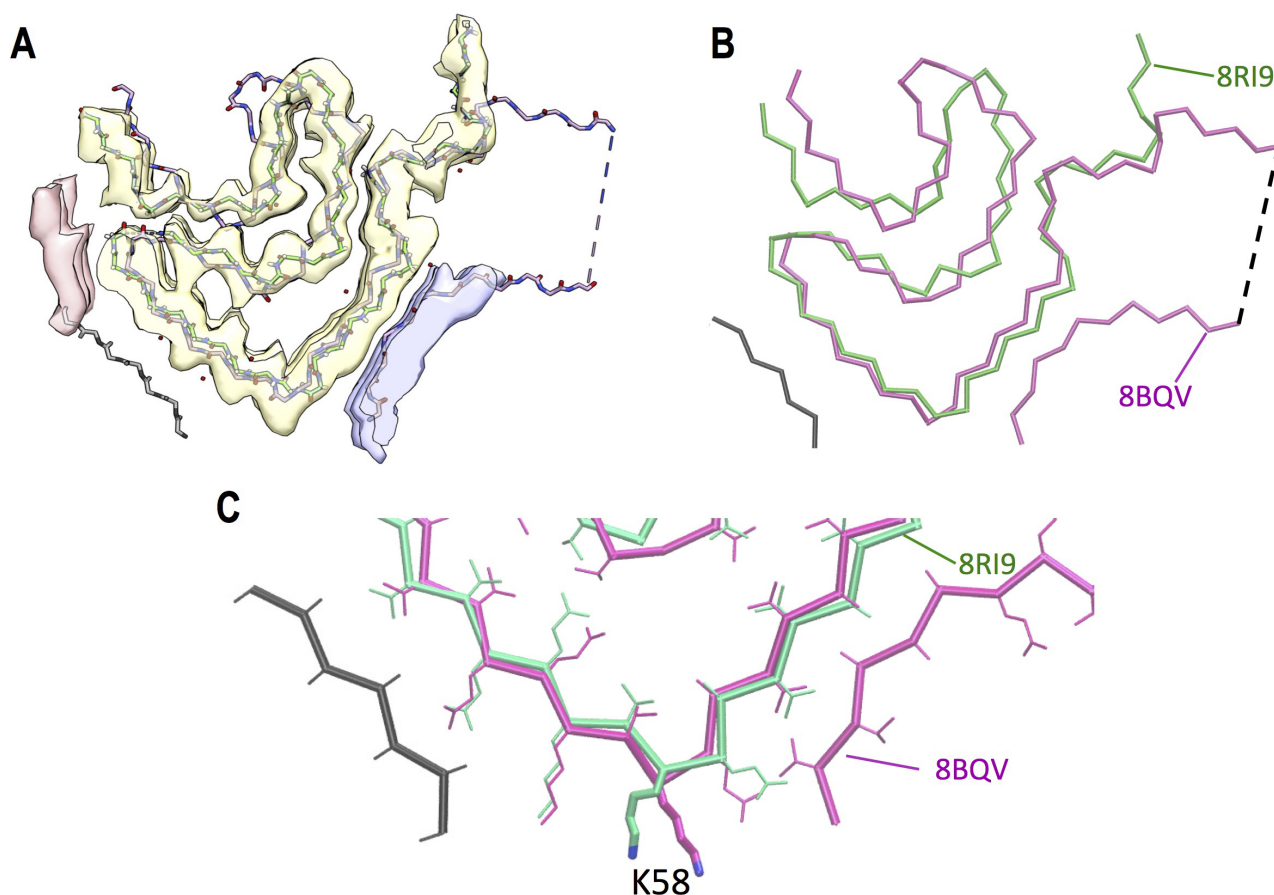

**Figure S11. Structural superimposition between the structure of juvenile-onset synucleinopathy (JOS) fibrils of  $\alpha$ S and the *late-fibrils* from condensates.** Backbone atoms of *late-fibrils* from  $\alpha$ S condensates (PDB code: 8RI9) and JOS singlet fibrils<sup>3</sup> (PDB code: 8BQV) are shown in green and purple, respectively (all panels). **A)** 8RI9 peptide backbone fitted into the *late-fibril* EM density (EMD-19184) with 8BQV aligned with respect to 8RI9. The resolution of two regions of the density map (colored in purple and pink) was too low to enable model building, however, the overlay with JOS fibrils<sup>3</sup> suggests that one of these regions (purple density) can be attributed to the N-terminal region of  $\alpha$ S structured around the core of the fibril. The JOS structure<sup>3</sup> also reported an unknown peptide density modelled as polyalanine (grey). **B)** Backbone trace alignment of 8RI9 (purple) and 8BQV (green). The RMSD between the structures (calculated using C $\alpha$  atoms of residues 41 to 98) is 4.3 Å. **C)** Local alignment of the most similar regions, spanning residues 41 to 66 (RMSD on C $\alpha$  atoms of 1.12 Å) and comprising the first two  $\beta$ -strands of the core. There is a close match between the two structures in this region, including the topology of Lys 58, which points outward in both assemblies.



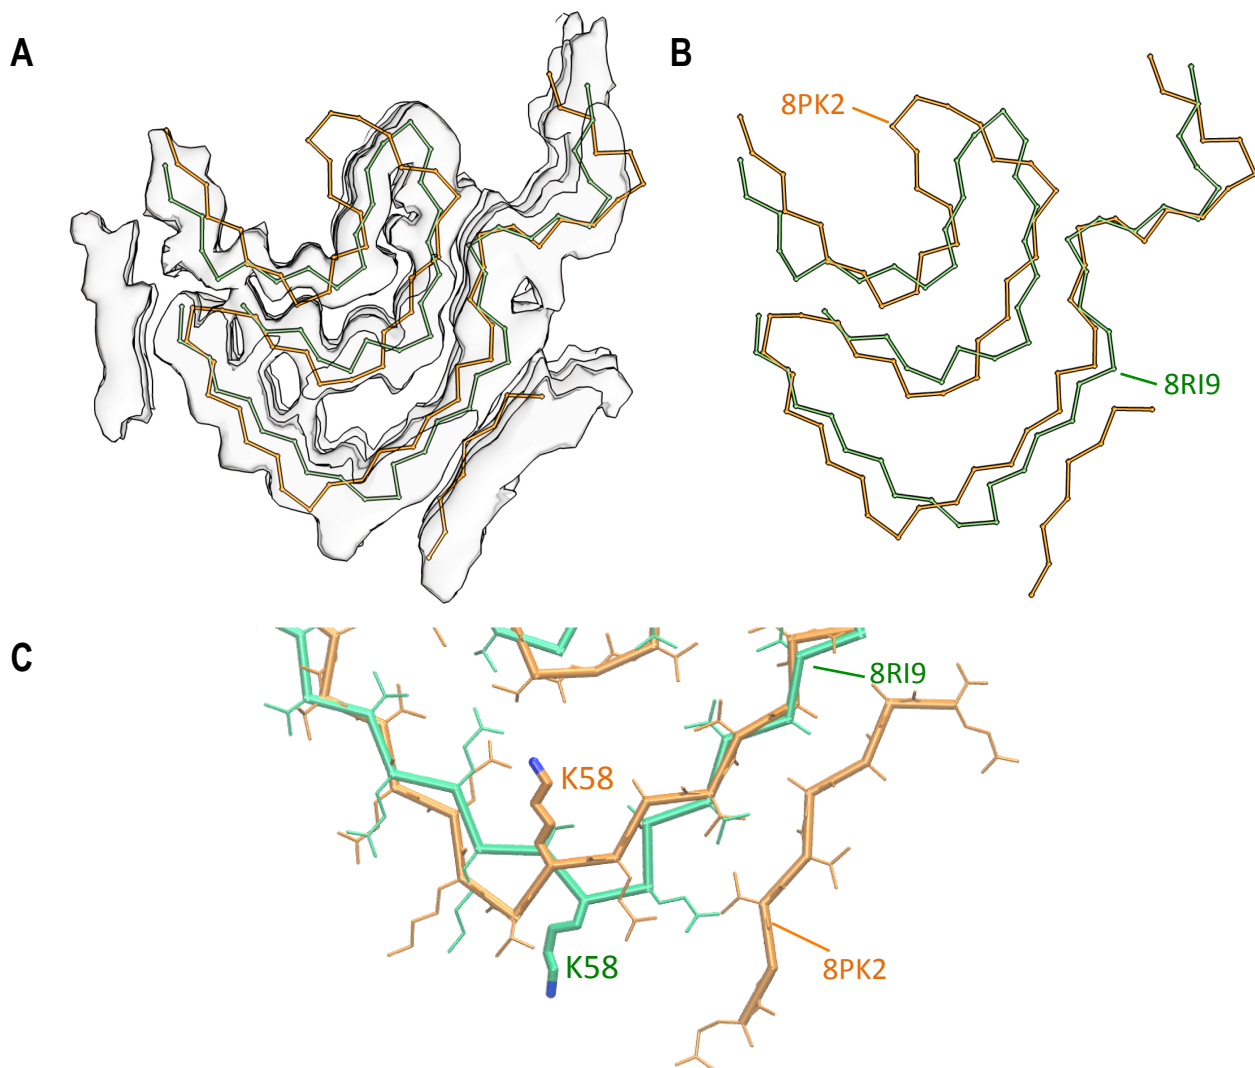

**Figure S12. Structural superimposition between the 1M monofilament polymorph observed *in vitro* at pH 7.0<sup>4</sup> and the *late-fibrils* from  $\alpha$ S condensates. **A)**  $\alpha$ -trace fitted into the *late-fibril* EM density (EMD-19184) with 8PK2 aligned with respect to 8RI9 by considering the  $\text{C}\alpha$  atoms of residues 41 to 97 only. *late-fibril* (PDB code: 8RI9) and 1M filament<sup>4</sup> (PDB code: 8PK2) are shown in green and orange, respectively (all panels). **B)** Backbone traces as in panel A. The RMSD between the structures (calculated using  $\text{C}\alpha$  atoms of residues 41 to 97) is 4.63 Å. **C)** Local alignment of the region spanning residues 41 to 66 (RMSD on  $\text{C}\alpha$  atoms of 2.34 Å) and comprising the first two  $\beta$ -strands of the core. In this case, Lys 58 points outward in the *late-fibrils* and inward in the 1M. The observation that the *late-fibrils* adopt a monofilament topology at pH 7.4 suggests the possibility of a local lowering of the pH within the  $\alpha$ S condensates, as *in vitro* the 1M polymorphism has been shown to occur at pH 7.0.<sup>4</sup>**

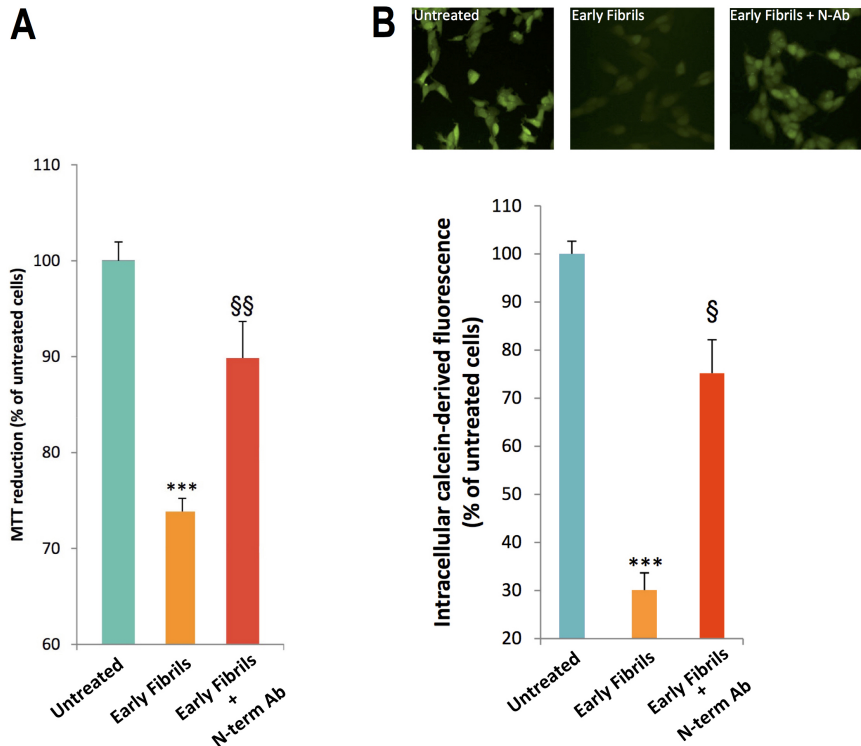

**Figure S13. Suppression of the cytotoxicity of the early-fibrils of  $\alpha$ S upon binding of the N-terminal antibody.** **A)** Cell dysfunction monitored by the reduction of MTT in human neuroblastoma SH-SY5Y upon incubation with 0.3  $\mu$ M (monomer equivalents) of *early-fibrils* from  $\alpha$ S condensates, and in the presence or absence of equimolar amounts of N-terminal antibody. **B)** Cell dysfunction monitored by intracellular ROS production in human neuroblastoma (details as in panel A). \*\*\* indicates a P value < 0.001 with respect to untreated cells. § and §§ indicate P values respectively < 0.01 and < 0.05 with respect to cells treated with *early-fibrils* (0.3  $\mu$ M monomer equivalents).

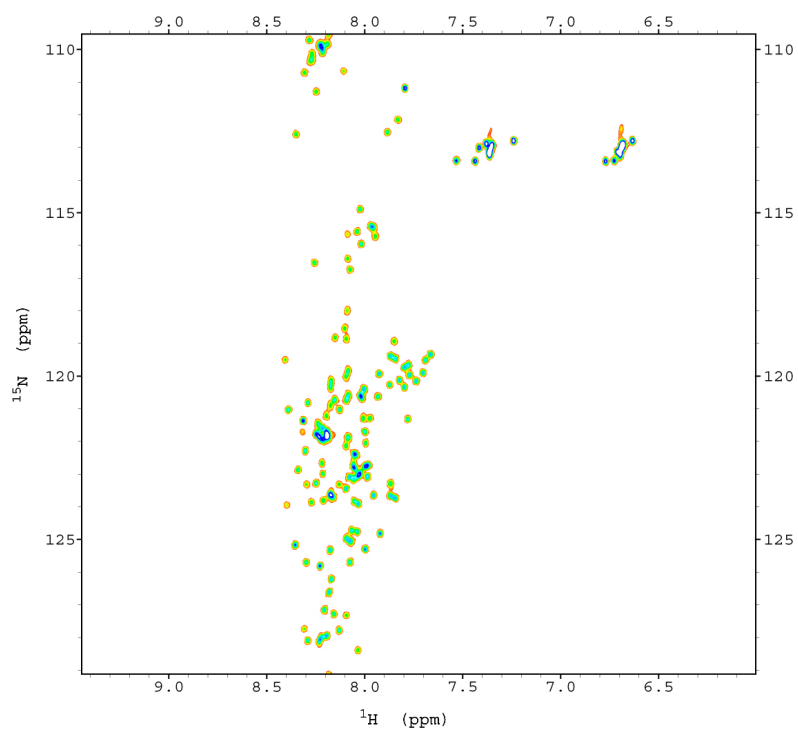

**Figure S14.  $^1\text{H}$ - $^{15}\text{N}$  HSQC spectrum of  $\alpha\text{S}$  monomers under conditions promoting self-assembly in liquid-like spherical condensates.** The spectrum was recorded at 283 K at a  $^1\text{H}$  frequency of 700 MHz, using a protein concentration of 100  $\mu\text{M}$ .

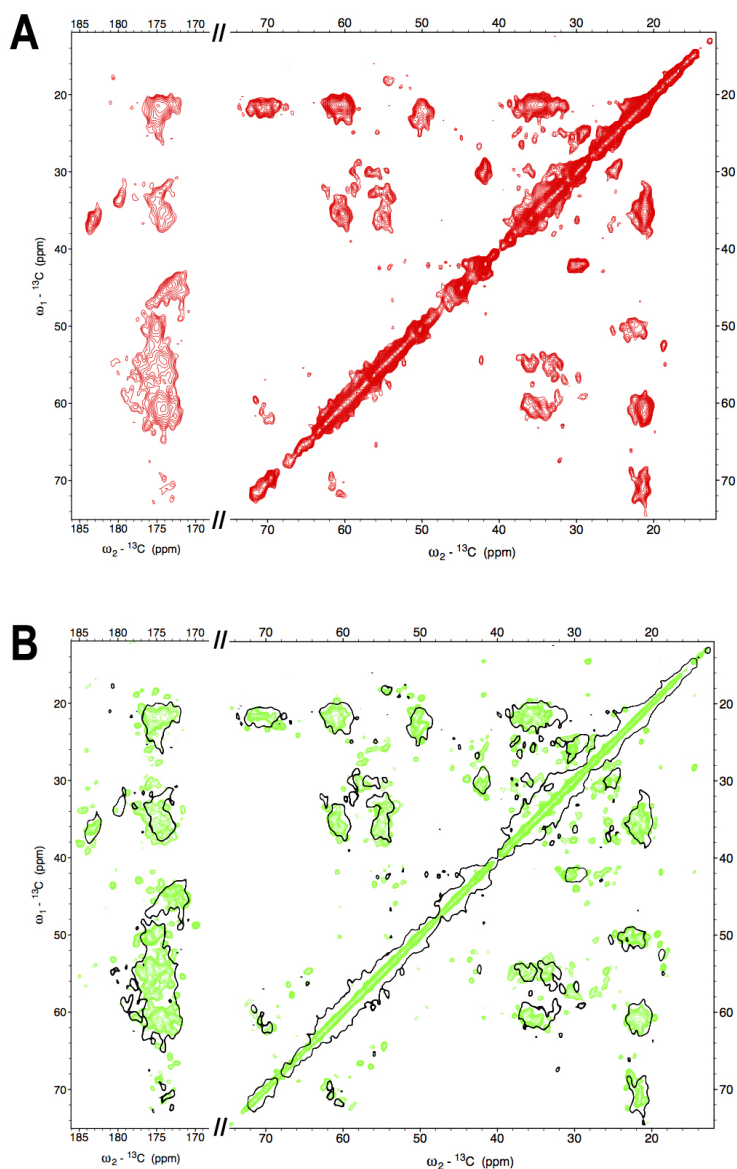

**Figure S15.  $^{13}\text{C}$ - $^{13}\text{C}$  DARR spectra of *late-fibrils* of  $\alpha\text{S}$ .** **A)**  $^{13}\text{C}$ - $^{13}\text{C}$  DARR correlation spectrum (aliphatic and carbonyl regions) of the *late-fibrils* of  $\alpha\text{S}$  after 3 weeks of incubation (standard *late-fibrils*). Prior the packing into 3.2 mm ssNMR rotor, the fibrils were pelleted and resuspended in PBS for 24h at 37°C. ssNMR spectra were acquired at 25°C using 20 ms of mixing time and 1 ms of contact time and a MAS rate of 12.5 kHz. **B)**  $^{13}\text{C}$ - $^{13}\text{C}$  DARR spectra of standard *late-fibrils* (black) and seeded *late-fibrils* (green). The seeded *late-fibrils* were obtained using seeds from the sonicated standard *late-fibrils* (1 min sonication using a Bandelin Sonopuls HD2070 sonicator with 30% cycles at 10% maximum power). The sonicated fibrils were incubated with fresh monomers at 37°C overnight (with seeds representing 10% of  $\alpha\text{S}$ ) at a total protein concentration of 100  $\mu\text{M}$  in PBS and 0.02% sodium azide. For clarity, the spectrum of standard *late-fibrils* is shown as a single black contour line. The seeded fibrils show essentially the same spectrum of the standard *late-fibrils*, but with better signal to noise and improved line widths of the resonances, thus enabling the assignment of the peaks.



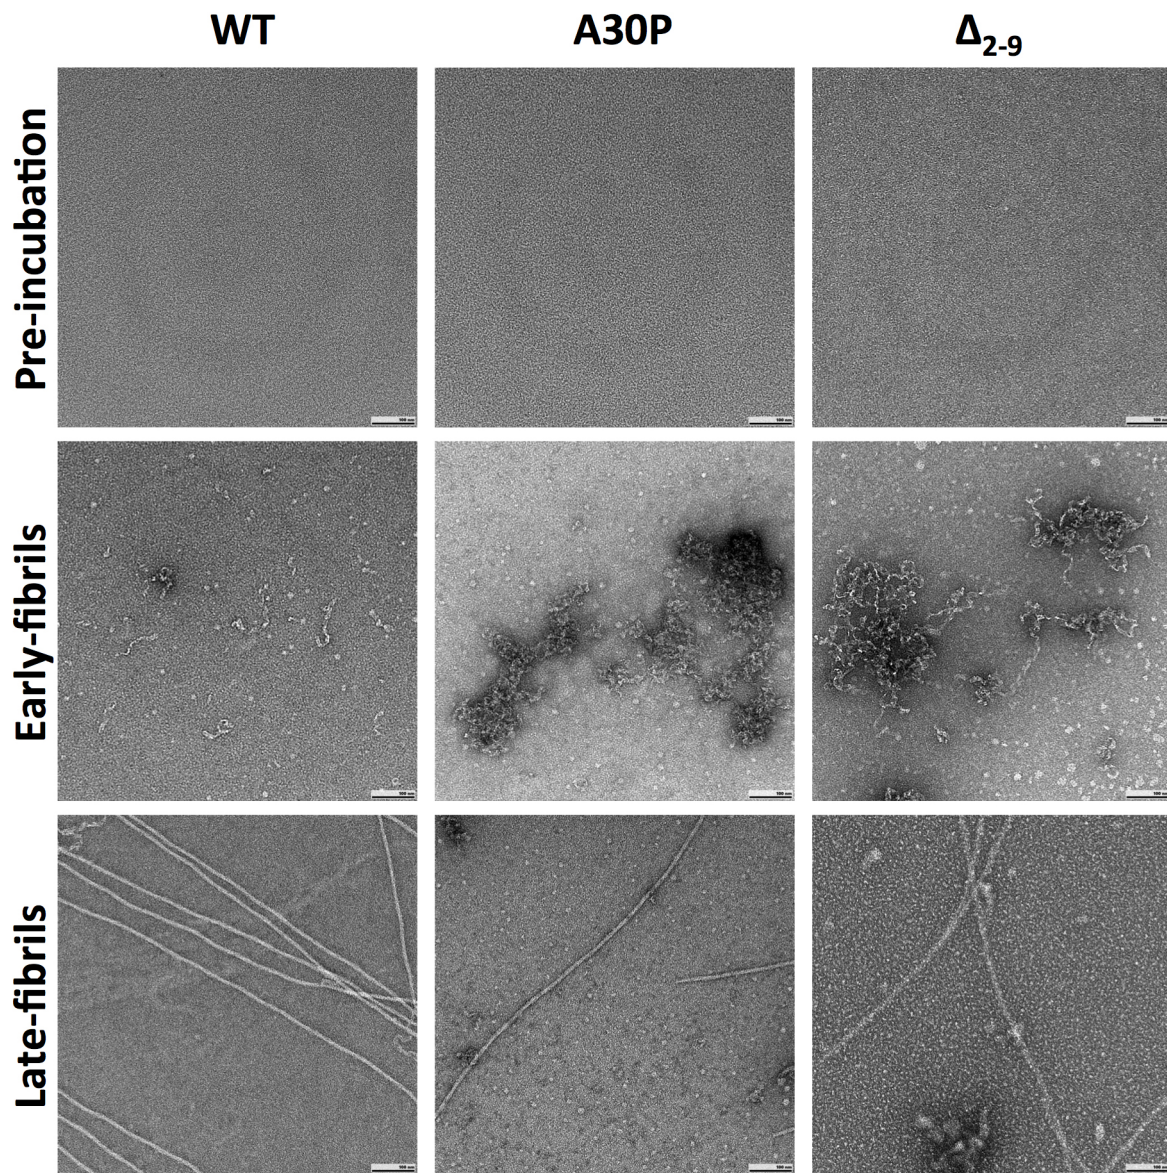

**Figure S16. Early- and late-fibrils with A30P and  $\Delta_{2-9}$  mutants of  $\alpha$ S.** Negatively stained TEM micrographs of a time-course showing pre-incubation, *early-fibrils* and *late-fibrils* of wild-type  $\alpha$ S (left column), A30P mutant  $\alpha$ S (middle column) and  $\Delta_{2-9}$   $\alpha$ S (right column). Scale bars are 100 nm in length.

**Table S1. MAS ssNMR Chemical shifts of early-fibrils core**

| Residue nr. | Residue name | Atom Type | Chemical Shift (ppm) |
|-------------|--------------|-----------|----------------------|
| 80          | LYS          | C         | 175.1                |
| 80          | LYS          | CA        | 56                   |
| 80          | LYS          | CB        | 37.4                 |
| 80          | LYS          | CD        | 30.4                 |
| 80          | LYS          | CE        | 42.7                 |
| 80          | LYS          | CG        | 25.8                 |
| 80          | LYS          | N         | 127.5                |
| 81          | THR          | C         | 174.0                |
| 81          | THR          | CA        | 61.4                 |
| 81          | THR          | CB        | 72.3                 |
| 81          | THR          | CG        | 22.4                 |
| 81          | THR          | N         | 122.5                |
| 82          | VAL          | C         | 174.4                |
| 82          | VAL          | CA        | 60.7                 |
| 82          | VAL          | CB        | 36.1                 |
| 82          | VAL          | CG%       | 21.9                 |
| 82          | VAL          | N         | 127.8                |
| 83          | GLU          | C         | 175.5                |
| 83          | GLU          | CA        | 55.4                 |
| 83          | GLU          | CB        | 35.1                 |
| 83          | GLU          | CD        | 183.0                |
| 83          | GLU          | CG        | 37.1                 |
| 83          | GLU          | N         | 127.6                |
| 84          | GLY          | C         | 172.1                |
| 84          | GLY          | CA        | 46.3                 |
| 84          | GLY          | N         | 113.1                |
| 85          | ALA          | C         | 176.2                |
| 85          | ALA          | CA        | 51.7                 |
| 85          | ALA          | CB        | 24.3                 |
| 85          | ALA          | N         | 125.1                |
| 86          | GLY          | C         | 172.1                |
| 86          | GLY          | CA        | 46.0                 |
| 86          | GLY          | N         | 110.5                |
| 87          | SER          | C         | 173.5                |
| 87          | SER          | CA        | 57.6                 |
| 87          | SER          | CB        | 67.0                 |
| 87          | SER          | N         | 118.7                |
| 88          | ILE          | CA        | 61.2                 |
| 88          | ILE          | CB        | 36.8                 |
| 88          | ILE          | CD1       | 15.0                 |
| 88          | ILE          | CG1       | 28.8                 |
| 88          | ILE          | N         | 126.8                |
| 89          | ALA          | C         | 176.2                |
| 89          | ALA          | CA        | 51.5                 |
| 89          | ALA          | CB        | 23.6                 |
| 89          | ALA          | N         | 130.8                |
| 90          | ALA          | N         | 125.0                |

**Table S2. CryoEM data collection parameters**

| <b>Data collection parameters</b>                |               |
|--------------------------------------------------|---------------|
| Microscope                                       | Titan Krios   |
| KeV                                              | 300           |
| Camera                                           | Falcon III    |
| Collection mode                                  | Counting mode |
| C2 aperture ( $\mu\text{m}$ )                    | 50            |
| Objective aperture ( $\mu\text{m}$ )             | 70            |
| Nominal magnification                            | 120 000       |
| Pixel size ( $\text{\AA}$ )                      | 1.043         |
| Number of frames                                 | 38            |
| Dose rate ( $\text{e}^-/\text{\AA}^2/\text{s}$ ) | 1.075         |
| Total dose ( $\text{e}^-/\text{\AA}^2$ )         | 43            |
| Defocus range ( $\mu\text{m}$ )                  | -0.9 to -3.0  |
| Number of micrographs                            | 3262          |

**Table S3. CryoEM Helical Reconstruction**

| <b>Data processing statistics</b>                  |           |
|----------------------------------------------------|-----------|
| Initial fibril segment number                      | 465 053   |
| Final particle number                              | 141 007   |
| Symmetry imposed                                   | C1        |
| Global map resolution ( $\text{\AA}$ ) FSC = 0.143 | 3.4       |
| Local resolution range ( $\text{\AA}$ )            | 3.2 – 4.0 |

## SI References

1. Takegoshi, K.; Terao, T.,  $^{13}\text{C}$ - $^1\text{H}$  dipolar recoupling under very fast magic-angle spinning using virtual pulses. *Solid state nuclear magnetic resonance* **1999**, *13* (4), 203-12.
2. Lange, A.; Becker, S.; Seidel, K.; Giller, K.; Pongs, O.; Baldus, M., A concept for rapid protein-structure determination by solid-state NMR spectroscopy. *Angewandte Chemie* **2005**, *44* (14), 2089-92.
3. Yang, Y.; Garringer, H. J.; Shi, Y.; Lövestam, S.; Peak-Chew, S.; Zhang, X.; Kotecha, A.; Bacioglu, M.; Koto, A.; Takao, M.; Spillantini, M. G.; Ghetti, B.; Vidal, R.; Murzin, A. G.; Scheres, S. H. W.; Goedert, M., New SNCA mutation and structures of  $\alpha$ -synuclein filaments from juvenile-onset synucleinopathy. *Acta neuropathologica* **2023**, *145* (5), 561-572.
4. Frey, L.; Ghosh, D.; Qureshi, B. M.; Rhyner, D.; Guerrero-Ferreira, R.; Pokharna, A.; Kwiatkowski, W.; Serdiuk, T.; Picotti, P.; Riek, R.; Greenwald, J., On the pH-dependence of  $\alpha$ -synuclein amyloid polymorphism and the role of secondary nucleation in seed-based amyloid propagation. *eLife* **2024**, doi:10.7554/eLife.93562.1.sa3.
